# Supplementary material for: The X-ray crystal structure of N,S-bis[(4′-chloro-2,2′∶6′,2″- terpyridine)platinum(ii)]-2-mercaptoimidazole tris-hexafluorophosphate and tris[(2,2′∶6′,2″-terpyridine)platinum(ii)]sulfonium tetra-perchlorate
Source: Royal Society of Chemistry journal article supplement (doi:10.1039/b103637h), 2001-01-01
Supplement: b103637h.doc [file b103637h.doc]

**Supplementary material***2-Mercaptoimidazole bis[(4'-chloro-2,2':6',2"-terpyridine)platinum(II)] trinitrate (****1****)*.  1H n.m.r. {400 MHz, D2O}:  *δ* 8 . 7 8   ( 2 H ,   d ,   J = 5 . 6   H z ,   H 6 ,   H 6 " ) ,   8 . 4 7   ( 2 H   s ,   H 3 ' ,   H 5 ' ) ,   8 . 4 6   ( 2 H ,   s ,   H 3 ' ,   H 5 ' ) ,   8 . 3 4 - 8 . 2 7   ( 4 H ,   m ,   2 x H 4 ,   2 x H 4 " ) ,   8 . 0 8   ( 2 H ,   d ,   J = 8 . 3   H z ,   H 3 ,   H 3 " ) ,   8 . 0 5   ( 2 H ,   d ,   J = 8 . 2   H z ,   H 3 ,   H 3 " ) ,   7 . 9 4   ( 2 H ,   d ,   J = 5 . 6   H z ,   H 6 ,   H 6 " )   7 . 6 0 - 7 . 5 4   ( 4 H ,   m ,   2 x H 5 ,   2 x H 5 " )   7 . 5 1   ( 1 H ,  bs, either Hx or Hy), 7.34 (1H, bs, either Hx or Hy). ESMS (1:1 MeOH:H2O,  CV=25 V): m/z   341.6 (MH3+, 100%), 511.6 (M2+ 15%).

*N,S-Bis [(2, 2':6' 2"-t erpyridine)platinum (II)] thioacetimine trinitrate (****2****).*
1H n.m.r  (400 MH z, D2O): *δ* 8.77, (2H, d, J = 5.5 Hz, H6/6"), 8.42 (1H, t, J = 8.2Hz, H4'), 8.38 (1H, t, J = 8.2Hz, H4'), 8.30 (2H, d, J = 5.1Hz, H6/6"). 8.28-8.20, (4H, m, 2xH4/2xH4"), 8.10 (2H, d, J = 8.2 Hz, H3'/5'),8.05 (2H, d, J = 8.2 Hz, H3'/5'), 8.01 (2H, d, J = 7.7 Hz, H3/3:), 8.00 (2H, d, J = 7.7 Hz, H3/3"), 7.58-7.52 (4H, m. 2xH5/2xH5"), 2.87 (3H, s, CH3). 1H n.m.r. {500 MHz,  d6-DMSO): *δ* 1 0 . 6 0  ( 1 H , s , N H ), 8 . 8 2  (2H  d , J = 5.6 H z, H 6 / 6"), 8.55   (1H, t , J = 8.1  H z, H 4'),  8.52 (1H, t, J  =  8.1 H z, H 4'),  8.44 (2H, d, J = 5.5 H z ,  H 6 / 6"), 8.41 (2H, d, J  =  8.1 Hz, H 3'/ 5'),  8.37 (2H, d, J = 8.1 Hz, H 3'/ 5'),  8.34-8.32 (8H, m, 2 x H 3,  2 x H 3",  2 x H4,  2 x H4", 7.70-7.64 (4H, m, 2 x H5, 2 x H5"), 2.95 (3H, s,CH3). ESMS (1:1 MeOH:H2O, CV = 20V) m/z 310.1 (M3+, 100%), 444.1 {[Pt(terpy)-S-Pt(Terpy)]2+, 69%).
